# Supplementary material for: Die another day: explanations based on qualitative comparative analysis (QCA) for the survival and non-survival of isolated ski lifts in Switzerland
Source: Copernicus journal article supplement (doi:10.5194/gh-79-85-2024), 2024-03-26
Supplement: Supplementary file 1 [file gh-79-85-2024-supplement.zip]

# Robustness Test Protocol LSAP Outcome

| Sensitivity Ranges     |                                                                                  |                     |                          |                          |
|------------------------|----------------------------------------------------------------------------------|---------------------|--------------------------|--------------------------|
|                        | Condition                                                                        | 0                   | 0.5                      | 1                        |
| Calibration anchors    | LOWALTOPS                                                                        | Lower: 1600         | Lower: 1300.1            | Lower: 1000              |
|                        |                                                                                  | Upper: NA           | Upper: 1450.1            | Upper: 1150              |
|                        | LOWSNOWFEB                                                                       | Lower: 70           | Lower: 49.9              | Lower: 30                |
|                        |                                                                                  | Upper: NA           | Upper: 204.9             | Upper: NA                |
| Parameters             | Raw consistency                                                                  | Lower: 0.715        | Threshold: 0.745         | Upper: 0.745             |
|                        | Frequency                                                                        | Lower: 1            | Threshold: 1             | Upper: 4                 |
| Robustness parameters  |                                                                                  |                     |                          |                          |
| Fit oriented           | $RF_{cons}$ : 1                                                                  | $RF_{cov}$ : 1      | $RF_{SC\_minTS}$ : 0.918 | $RF_{SC\_maxTS}$ : 0.833 |
| Case oriented          | $RCR_{typ}$ : 0.922                                                              | $RCR_{dev}$ : 0.833 | RCC_Rank: 2              |                          |
| Worst performing model |                                                                                  |                     |                          |                          |
| Model                  | ~LOWALTOPS*NOREPLACEMENT*NOSNOWMAKING+NOREPLACEMENT*NOSNOWMAKING*HIGHCOMPETITION |                     |                          |                          |

## Robustness Test Protocol ~LSAP Outcome

| Sensitivity Ranges     |                                                                                                         |                     |                          |                          |
|------------------------|---------------------------------------------------------------------------------------------------------|---------------------|--------------------------|--------------------------|
|                        | Condition                                                                                               | 0                   | 0.5                      | 1                        |
| Calibration anchors    | LOWALTOPS                                                                                               | Lower: 1550         | Lower: 1300.1            | Lower: 1000              |
|                        |                                                                                                         | Upper: 2150         | Upper: 1350.1            | Upper: 1300              |
|                        | LOWSNOWFEB                                                                                              | Lower: 60           | Lower: 44.9              | Lower: 30                |
|                        |                                                                                                         | Upper: 85           | Upper: 54.9              | Upper: 35                |
| Parameters             | Raw consistency                                                                                         | Lower: 0.73         | Threshold: 0.75          | Upper: 0.75              |
|                        | Frequency                                                                                               | Lower: 1            | Threshold: 1             | Upper: 1                 |
| Robustness parameters  |                                                                                                         |                     |                          |                          |
| Fit oriented           | $RF_{cons}$ : 0.995                                                                                     | $RF_{cov}$ : 0.97   | $RF_{SC\_minTS}$ : 0.967 | $RF_{SC\_maxTS}$ : 0.901 |
| Case oriented          | $RCR_{typ}$ : 0.929                                                                                     | $RCR_{dev}$ : 0.333 | RCC_Rank: 4              |                          |
| Worst performing model |                                                                                                         |                     |                          |                          |
| Model                  | ~NOREPLACEMENT*~HIGHCOMPETITION+~NOSNOWMAKING*~HIGHCOMPETITION+LOWELEVDIFF*~NOREPLACEMENT*~NOSNOWMAKING |                     |                          |                          |
