# Supplementary material for: Die another day: explanations based on qualitative comparative analysis (QCA) for the survival and non-survival of isolated ski lifts in Switzerland
Source: Copernicus journal article supplement (doi:10.5194/gh-79-85-2024), 2024-03-26
Supplement: Supplementary file 2 [file gh-79-85-2024-supplement.zip]

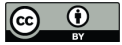

*Supplement of*

**Die another day: explanations based on qualitative comparative analysis (QCA) for the survival and non-survival of isolated ski lifts in Switzerland**

**Steve Schlegel and Christoph Schuck**

*Correspondence to:* Christoph Schuck ([christoph.m.schuck@tu-dortmund.de](mailto:christoph.m.schuck@tu-dortmund.de))

- gh-79-85-2024-supplement-title-page.pdf
- 01 Necessary Conditions both Outcomes.txt
- 02 Truth Table LSAP Outcome.txt
- 03 Truth Table LSAP Outcome.txt
- 04 Sufficient Conditions LSAP Outcome.txt
- 05 Sufficient Conditions LSAP Outcome.txt
- 06 Robustness Test Protocol.pdf
- ISOLATEDLIFTRAW.csv
- Isolated\_Lifts\_Complete.R

The copyright of individual parts of the supplement might differ from the article licence.
